# Supplementary material for: Multidrug resistance protein MdtM adds to the repertoire of antiporters involved in alkaline pH homeostasis in Escherichia coli
Source: PubMed Central journal article supplement (PMC3668916; doi:10.1186/1471-2180-13-113), 2013-05-23

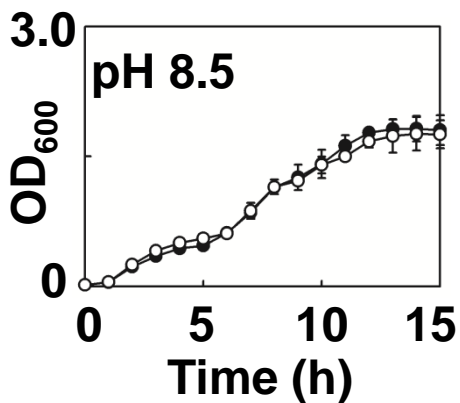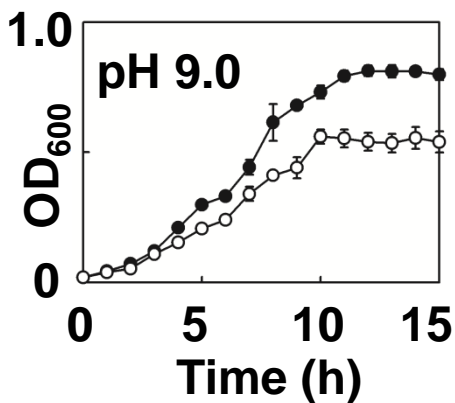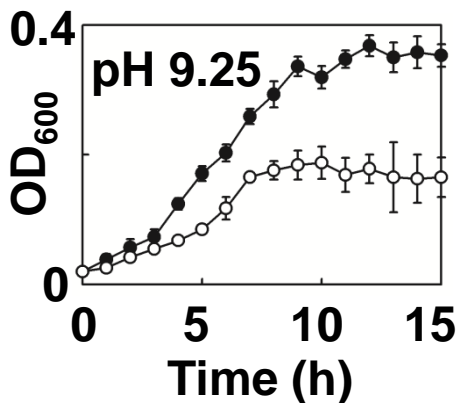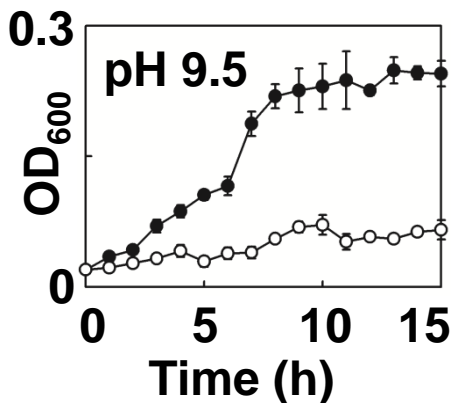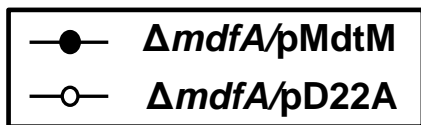

Supplement: 1471-2180-13-113-S1.pdf [file 1471-2180-13-113-S1.pdf]
